# Supplementary material for: Development of ISB 1442, a CD38 and CD47 bispecific biparatopic antibody innate cell modulator for the treatment of multiple myeloma
Source: PubMed Central journal article supplement (PMC10917784; doi:10.1038/s41467-024-46310-y), 2024-03-06
Supplement: 41467_2024_46310_MOESM1_ESM.pdf [file 41467_2024_46310_MOESM1_ESM.pdf]

# Supplementary Information File

## Development of ISB 1442, a CD38 and CD47 bispecific biparatopic antibody innate cell modulator for the treatment of multiple myeloma

C. Grandclément <sup>#,1</sup>, C. Estoppey <sup>#,1</sup>, E. Dheilly <sup>#,1</sup>, M. Panagopoulou <sup>1</sup>, T. Monney <sup>1</sup>, C. Dreyfus <sup>1</sup>, J. Loyau <sup>1</sup>, V. Labanca <sup>1</sup>, A. Drake <sup>1</sup>, S. De Angelis <sup>1</sup>, A. Rubod <sup>1</sup>, J. Frei <sup>1</sup>, L. N. Caro <sup>1</sup>, S. Blein <sup>1</sup>, E. Martini <sup>1</sup>, M. Chimen <sup>1</sup>, T. Matthes <sup>2</sup>, Z. Kaya <sup>3</sup>, C. M. Edwards <sup>3</sup>, J. R. Edwards <sup>3</sup>, E. Menoret <sup>4</sup>, C. Kervoelen <sup>4</sup>, C. Pellat-Deceunynck <sup>4,5</sup>, P. Moreau <sup>4,5,6</sup>, M.L. Mbow <sup>1</sup>, A. Srivastava <sup>1</sup>, M.R. Dyson <sup>1</sup>, E.A. Zhukovsky <sup>1</sup>, M. Perro <sup>1,#,\*</sup> and S. Sammicheli <sup>1,#,\*</sup>

# Equally Contributing Authors, \* Corresponding authors

<sup>1</sup> Ichnos Glenmark Innovation, Lausanne, CH

<sup>2</sup> Haematology Service, Department of Oncology and Clinical Pathology Service, Department of Diagnostics, University Hospital Geneva, 1211, Geneva, Switzerland.

<sup>3</sup>Nuffield Department of Orthopaedics, Rheumatology and Musculoskeletal Sciences, Botnar Institute, University of Oxford, Oxford, United Kingdom.

<sup>4</sup>Nantes Université, Inserm, CNRS, Université d'Angers, CRCI2NA, Nantes, France

<sup>5</sup>SIRIC ILIAD, Angers, Nantes, France

<sup>6</sup>Service d'Hématologie Clinique, Unité d'Investigation Clinique, CHU, Nantes, France.

## Supplementary Figure 1: Affinity measurements of ISB 1442 for CD38 and CD47 by Surface Plasmon Resonance

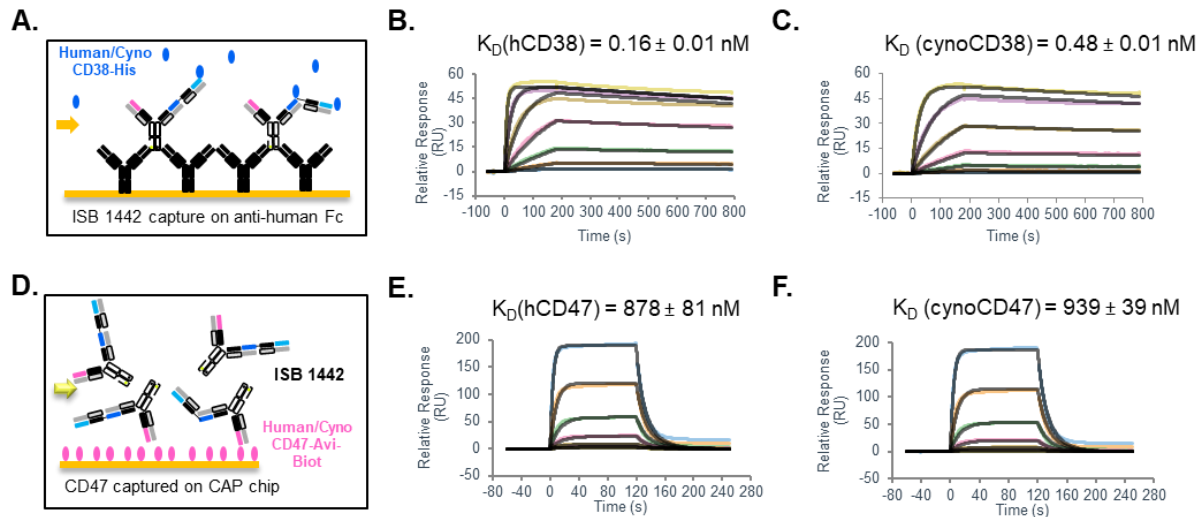

### Supplementary Figure 1: Affinity measurements of ISB 1442 for CD38 and CD47 by Surface Plasmon Resonance

A. Schematic view of the assay setup for measurement of ISB 1442 affinity for CD38. ISB 1442 is immobilized on anti-human Fc chip and human or cynomolgus monkey CD38 is flushed onto the immobilized antibody at increasing concentrations. B-C. Fitted sensorgrams of a representative measurement show the binding of human (B) and cynomolgus monkey (C) CD38 onto immobilized ISB 1442 at increasing concentrations ranging from 0.14 nM to 100nM. Colored curves represent experimental data and black curves represent 1:1 kinetic fit. Average  $K_D$  ( $\pm$  standard deviation) of at least three replicates is shown. D. Schematic view of the assay setup for measurement of ISB 1442 affinity for CD47. Biotinylated CD47 is immobilized on CAP chip and ISB 1442 is flushed onto the immobilized CD47 at increasing concentrations. E-F. Fitted sensorgrams of a representative measurement show the binding of ISB 1442 onto immobilized human (E) and cynomolgus monkey (F) CD47 at increasing concentrations ranging from 2.7 nM to 2  $\mu$ M. Colored curves represent experimental data and black curves represent 1:1 kinetic fit. Average  $K_D$  ( $\pm$  standard deviation) of at least three replicates is shown.

## Supplementary Figure 2. Competition anti-CD38-B6-D9 Fab and anti-CD38-E2RecA Fab to isatuximab

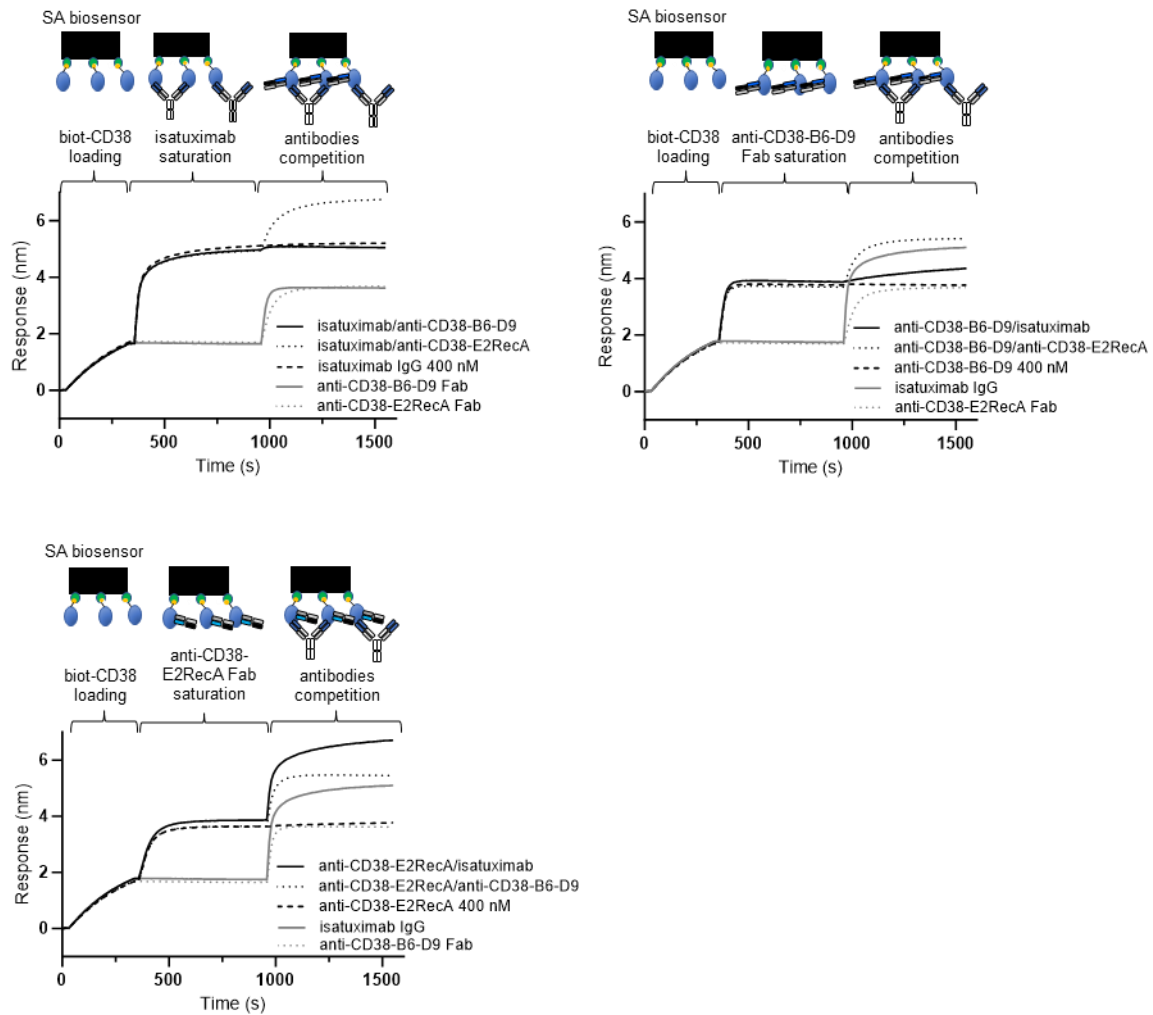

## Supplementary Figure 2: Competition anti-CD38-B6-D9 Fab and anti-CD38-E2RecA Fab to isatuximab

Competition binding assay by Octet Bio-Layer Interferometry (BLI) between anti-CD38-B6-D9 Fab, anti-CD38-E2RecA Fab and isatuximab for binding to CD38. CD38-loaded biosensor was dipped in a solution of isatuximab (top left panel), anti-CD38-B6-D9 Fab (top right panel) or anti-CD38-E2RecA Fab (lower left panel) to reach saturation. Then, saturated biosensor was dipped into a premixed solution of saturating Fab and a second Fab (competition phase). Saturation of the CD38 sensor surface was verified by dipping antibody-saturated CD38 sensor surface into a solution of the same antibody at 2-fold concentration of saturation solution (400 nM). Grey lines represent controls to assess maximum binding of the second antibody in the absence of the first antibody. Plots show binding to the sensor tip as a wavelength shift (Response) over time. Curves are labelled by antibodies solution in competition phase.

### Supplementary Fig 3: Imaging of phagocytosis of CD38<sup>low</sup> Multiple Myeloma cells

A.

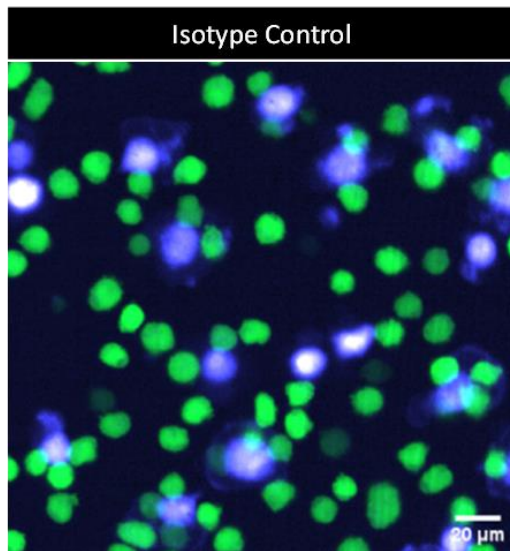

B.

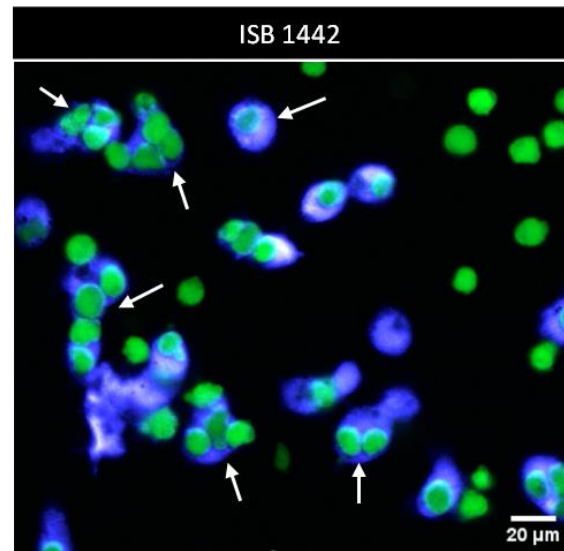

**Supplementary Figure 2: Live imaging performed with Perkin Elmer Operetta in the presence of control antibody or ISB1442 used at 80nM.** Snapshots from supplementary movies 1 and 2 showing monocytes-derived macrophages (blue) engulfing of KMS-12-BM CD38<sup>low</sup> tumor cells (green). Arrows show examples of cells phagocytosis.

## Supplementary Figure 4. Competition with daratumumab

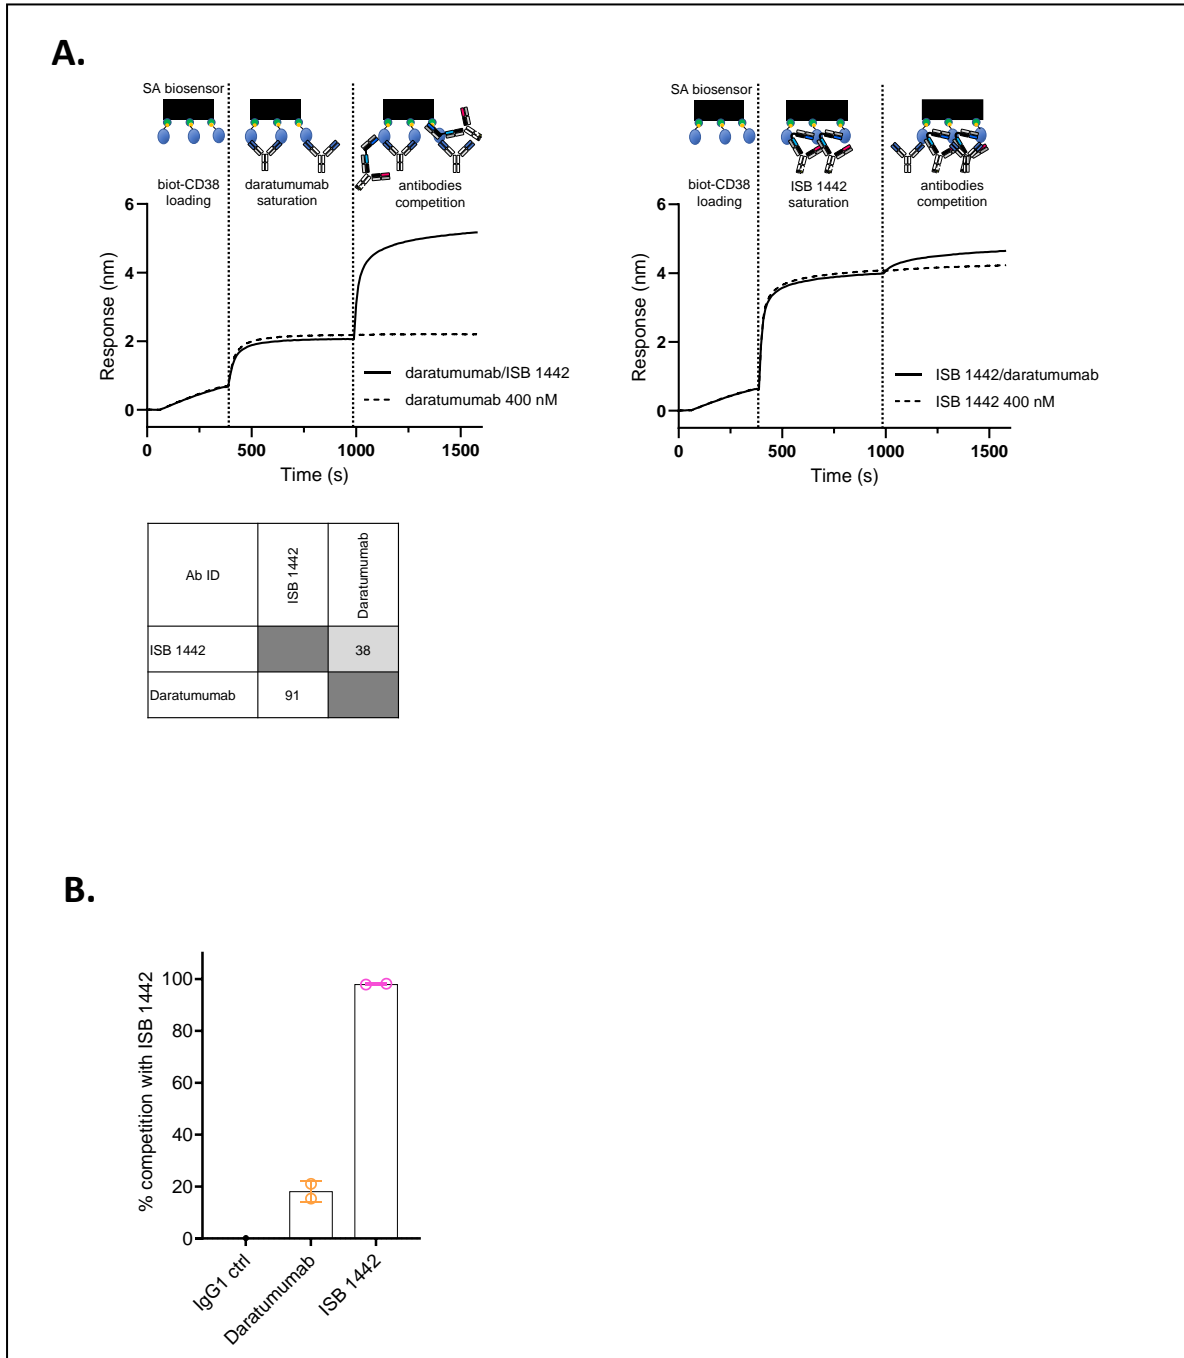

## Supplementary Figure 4: Competition with daratumumab

A. Competition binding assay by Octet Bio-Layer Interferometry (BLI) between ISB 1442 and daratumumab for binding to CD38. CD38-loaded biosensor was dipped in a solution of daratumumab (top left panel) or ISB 1442 (top right panel) to reach saturation. Then, saturated biosensor was dipped into a premixed solution of saturating antibody and the second antibody (competition phase). Saturation of the CD38 sensor surface was verified by dipping antibody-saturated CD38 sensor surface into a solution of the same antibody at 2-fold concentration of saturation solution (dashed lines). Plots show binding to the sensor tip as a wavelength shift (Response) over time. Curves are labelled by antibodies solution in competition phase. Lower left panel: Plot of saturating antibody in rows against competing antibodies in columns. Values indicate percentage of binding of

competing antibody to CD38 relative to maximum binding in the absence of saturating antibody. Values less than 30 were assigned as competing antibodies and shaded in black, values between 30 and 70 were assigned as partially competing antibodies and shaded in grey, while values greater than 70 were assigned as non-competing antibodies. Self-blocks are outlined by a dark-grey box. B. Percentage of competition with ISB 1442 mediated by control antibody (IgG1 ctrl), daratumumab (AF647 conjugated) or ISB 1442 (AF488 conjugated) antibodies in Raji-CD47KO cells. Mean of technical duplicates is represented here +/- Standard Deviations (SD). N=2.

**Supplementary Figure 5. ISB 1442 binding on leukemia cell lines in comparison to benchmark antibodies.**

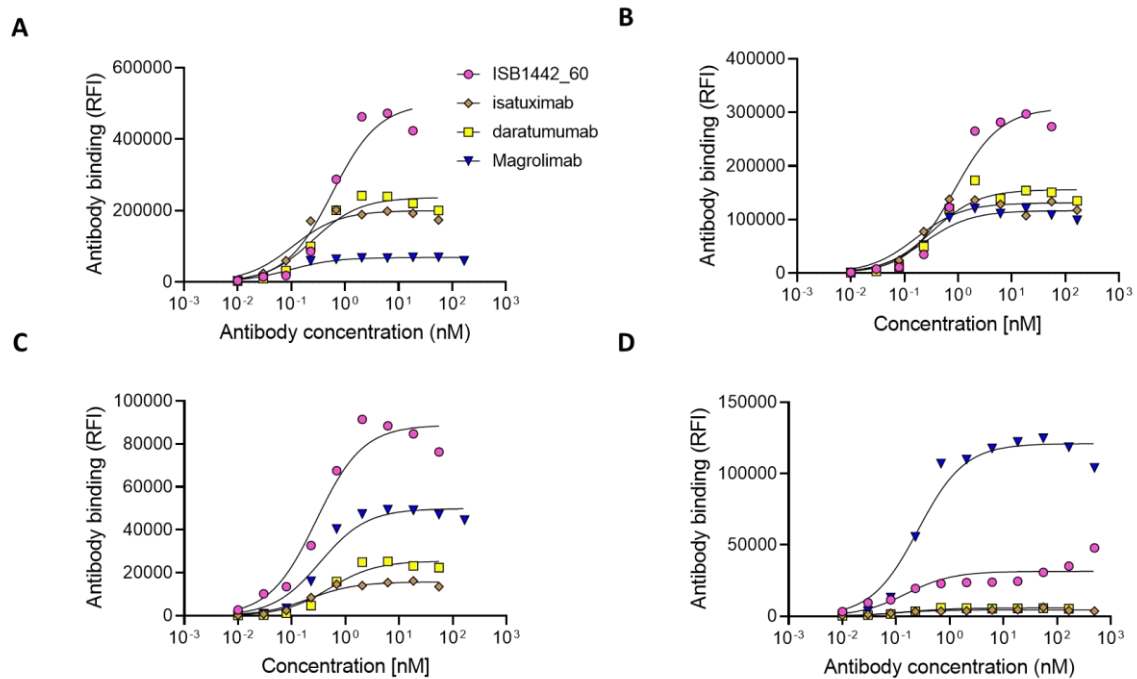

**Supplementary Figure 5: ISB1442 is binding tumor cell lines expressing different level of CD38. (A: Daudi; B: Raji; C: NCI-H929; D: KMS-12-BM).** A representative experiment of flow cytometric analyses of ISB1442 in comparison to anti-CD38 daratumumab or isatuximab and anti-CD47 (hu5F9) magrolimab on a panel of cell lines with different levels of CD38 and CD47 expression.

**Supplementary Figure 6. Phagocytosis of CD38 high tumor cells**

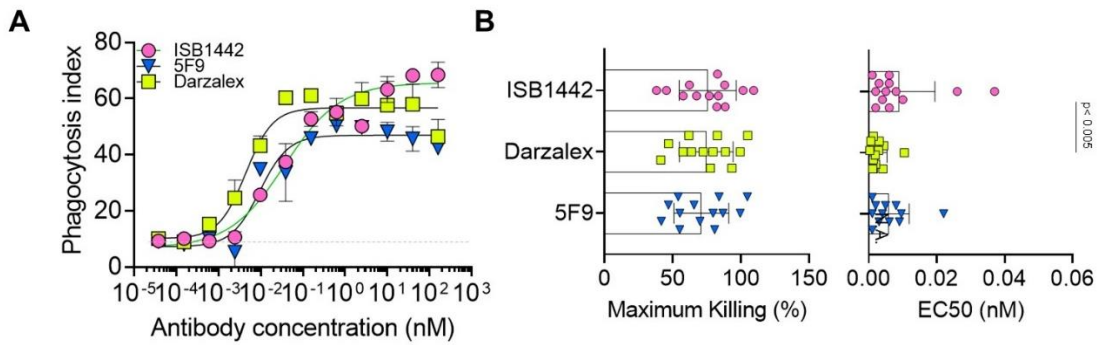

**Supplementary Figure 6: Phagocytosis of CD38 high tumor cells**

A. ADCP of CD38<sup>high</sup> tumor cells induced by ISB 1442 or benchmark controls. A representative curve of specific phagocytosis induced by ISB1442 and benchmark molecules with CD38<sup>high</sup> tumor cells (Daudi). B. Mean of duplicates is represented here +/- Standard Deviations. Compiled analyses of maximum phagocytosis and EC50 analyzed in multiple experiments with CD38<sup>high</sup> tumor cells (Daudi). Each dot represents specific phagocytosis induced by ISB1442 with an independent macrophage donor. N=13. Statistics: paired T test.

## Supplementary Figure 7. Live imaging of phagocytosis of CD38 high tumor cells

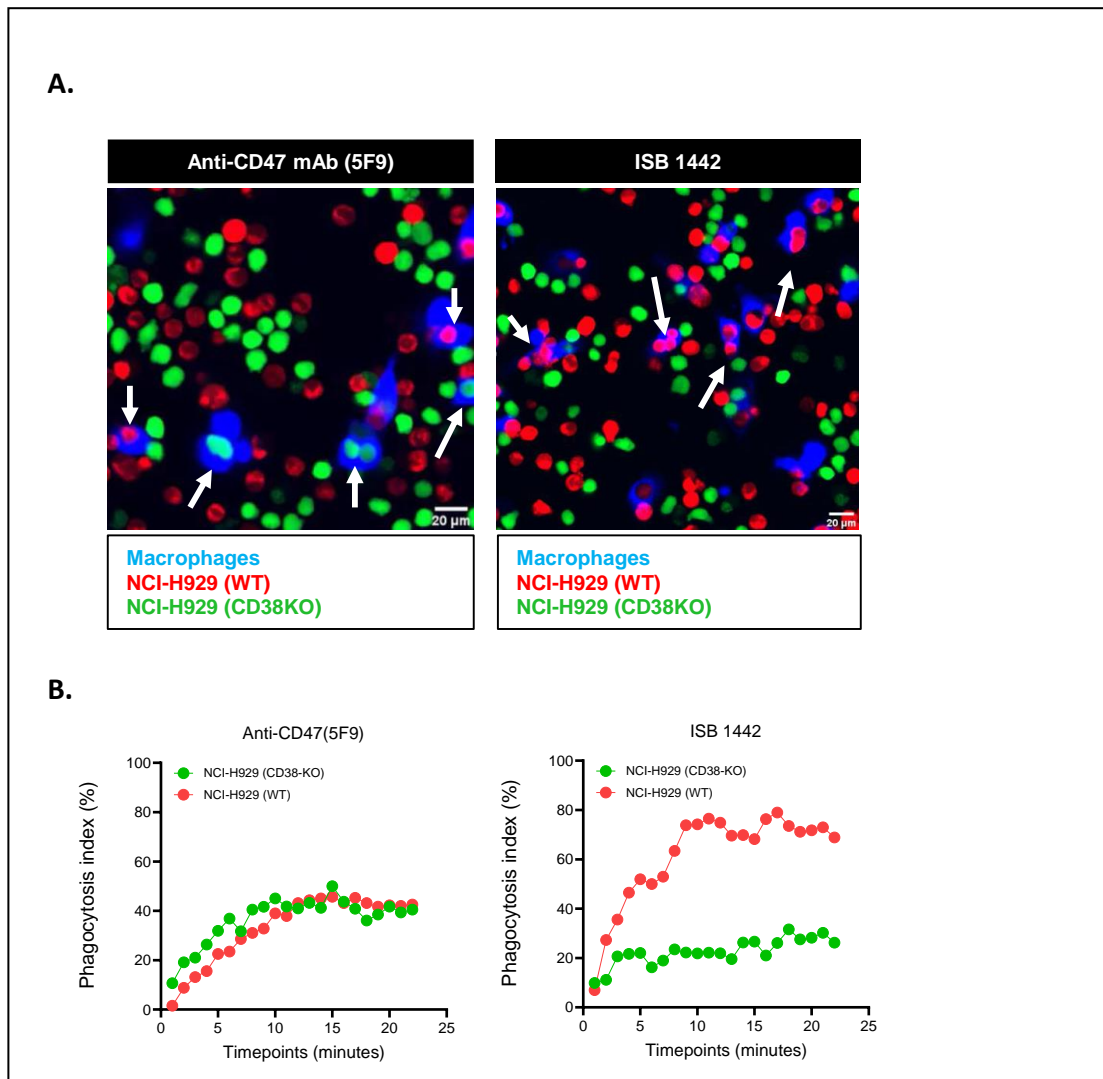

**Supplementary Figure 7: ISB 1442-induced phagocytosis is CD38 specific.** A. Snapshots from supplementary movies 3 and 4 showing monocytes-derived macrophages (blue) engulfing NCI-H929 CD38<sup>+</sup> tumor cells (red) or NCI-H929 CD38-KO tumor cells (green). Arrows show examples of cells phagocytosis. B. Quantification of tumor cells phagocytosis as in A, performed by Perkin Elmer using a dedicated script from supplementary movie 2. N=1.



**Supplementary Figure 8. Potency of ISB 1442 in concomitant treatment with daratumumab**

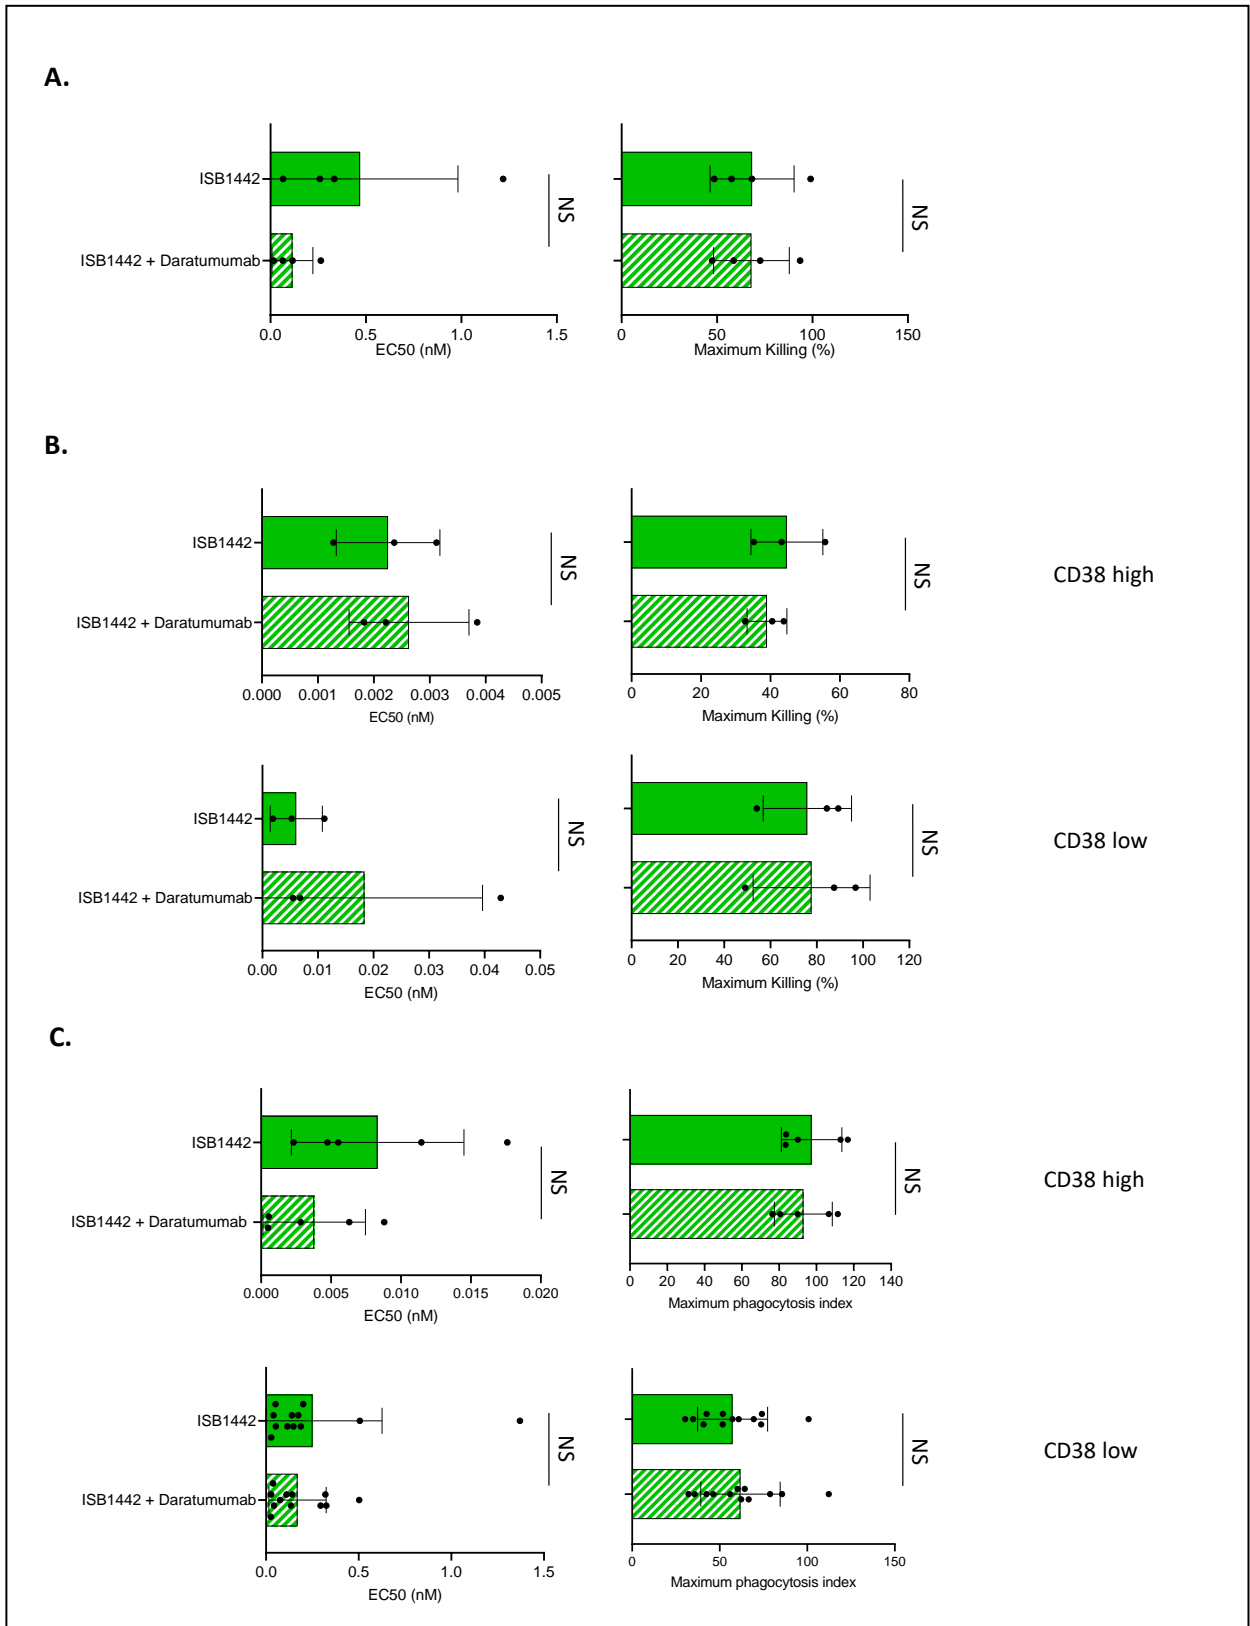

**Supplementary Figure 8: ISB 1442 potency in presence of daratumumab.**

Tumor cells were treated with equal quantity of daratumumab and ISB 1442 in all assay types. A. Compiled analyses of maximal killing and EC50 analyzed in multiple experiments in CD38<sup>high</sup> (Daudi) tumor cells as

measured by CDC. Statistics: ordinary One Way Anova with Tukey's multiple comparison test. NS = Not Significant. N=4. B. Compiled analyses of maximal killing and EC50 analyzed in multiple experiments in CD38<sup>high</sup> (Raji) and CD38<sup>low</sup> (NCI-H929) tumor cells as measured by ADCC. Statistics: ordinary One Way Anova with Tukey's multiple comparison test. NS = Not Significant. N=3. C. Compiled analyses of maximal phagocytosis and EC50 analyzed in multiple experiments in CD38<sup>high</sup> (Daudi) and CD38<sup>low</sup> (KMS12-BM) tumor cells as measured by ADCP. Statistics: ordinary One Way Anova with Tukey's multiple comparison test. NS = Not Significant. N=11.

## Supplementary Figure 9. Impact of CD38 and CD47 antigen sink on ISB 1442 potency

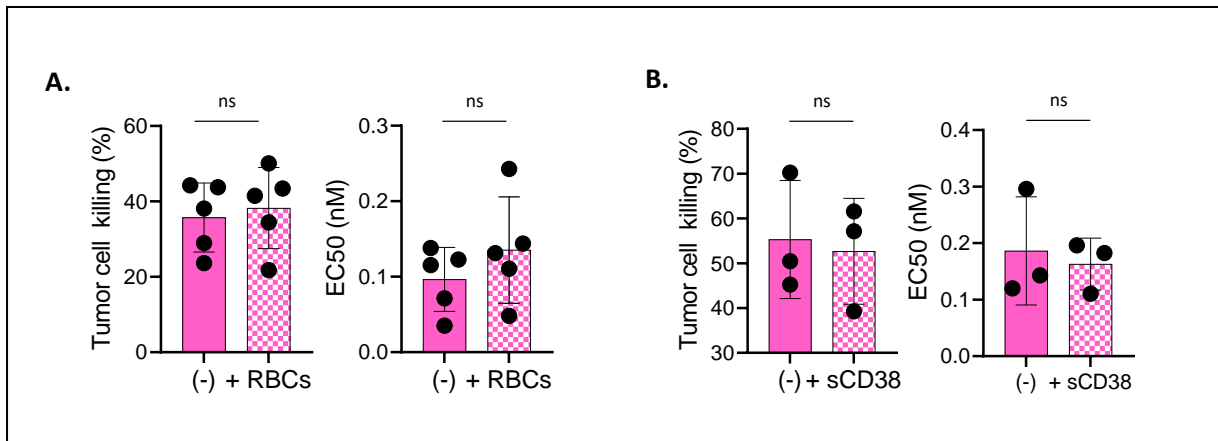

**Supplementary Figure 9: ISB 1442 killing potency in presence of fresh human red blood cells or soluble CD38.**

A. Compiled analyses of maximal killing (mean  $\pm$  SD) induced by ISB 1442 and benchmark antibodies in MMOAK using CD38<sup>int</sup> multiple myeloma cells (NCI-H929), in presence of fresh human RBCs (0.5M/well). A total of 5 PBMC/MDM donors have been evaluated in 2 independent experiments (n=5). Statistics, paired t test. ns: not significant. B. Compiled analyses of maximal killing (mean  $\pm$  SD) induced by ISB 1442 and benchmark antibodies in MMOAK using CD38<sup>int</sup> multiple myeloma cells (NCI-H929), in presence of 2.8ng/ml sCD38. A total of 5 PBMC/MDM donors have been evaluated in 2 independent experiments (n=5). Statistics, paired t test. ns: not significant

### Supplementary Figure 10. On target on RBC and platelet: Hemolysis and platelet aggregation

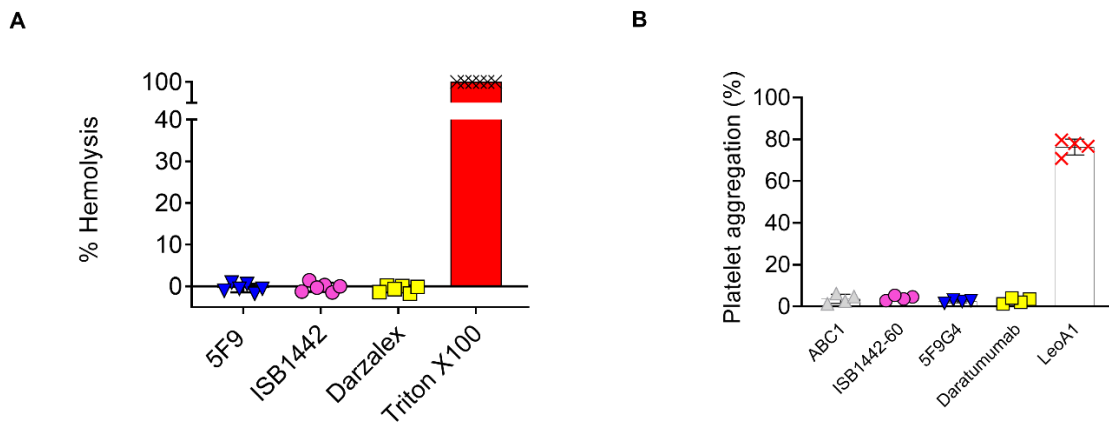

### Supplementary Figure 10: Hemolysis or platelet aggregation analysis upon ISB 1442 treatment ex vivo.

A. Hemolysis of human peripheral blood in comparison to Triton X-100 used as a positive control (n= 6 healthy donors). B. Platelet aggregation of test antibodies as compared to positive control LeoA1 (n=4 healthy donors).

## Supplementary Figure 11. FACS gating strategy

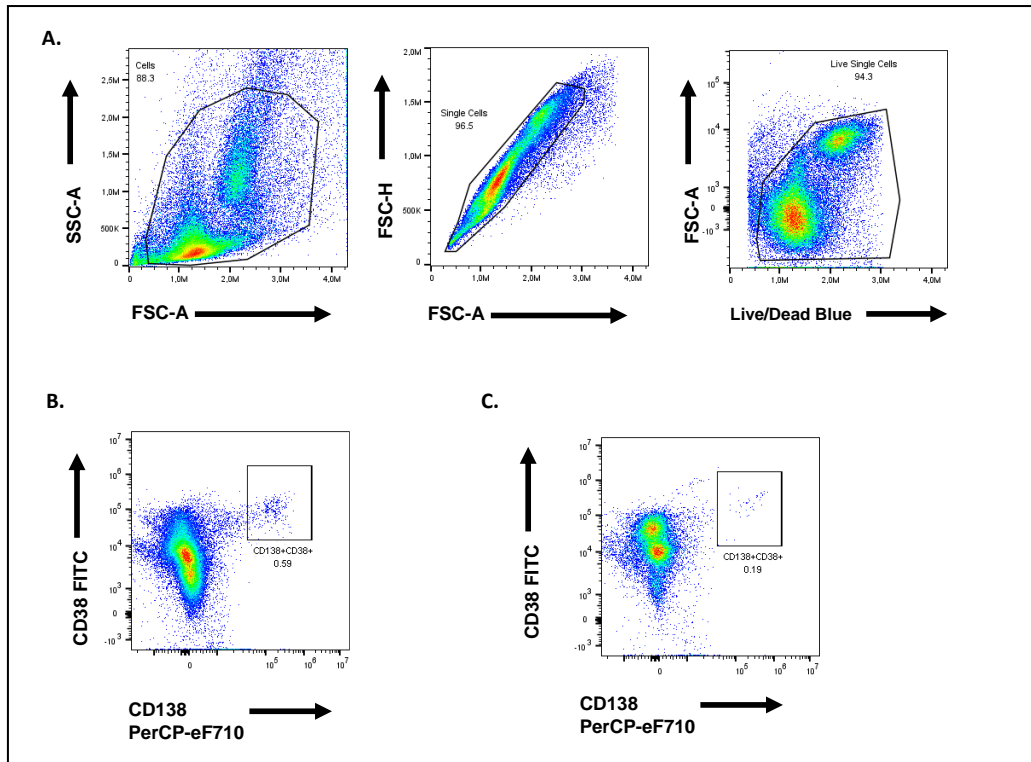

### Supplementary Figure 11: FACS gating strategy.

A. Gating strategy used in flow cytometry experiments with primary MM samples. Live immune cell populations were first gated based on the FSC-A and SSC-A. Single cells were gated based on FSC-A and FSC-H and live cells based on their negative expression of live/dead blue viability staining. Plasma cells were further gated based on CD38 and CD138 expression. B-C Representative plot showing MM cells gating of an untreated patients' samples (B) or a sample treated with ISB 1442 at 100 nM (C).

### Supplementary Table 1

|             | <b>K<sub>D</sub> to human protein (nM)</b> | <b>K<sub>D</sub> to cynomolgus monkey protein (nM)</b> |
|-------------|--------------------------------------------|--------------------------------------------------------|
| <b>CD47</b> | 880 ± 80                                   | 940 ± 40                                               |
| <b>CD38</b> | 0.16 ± 0.01                                | 0.48 ± 0.01                                            |

**Table 1.** Affinities of ISB 1442 in 2+1 bispecific format to human and cynomolgus monkey CD38 and CD47. Values are reported as mean ± standard deviation of at least three independent replicates.

**Supplementary Table 2. Affinity to Human Fcγ Receptors by SPR**

|                       | Affinity to human Fc receptor ( $K_D$ , nM $\pm$ standard deviation) |                 |                      |                 | Fold enhancement ISB 1442 over ISB 1442 WT Fc | Fold enhancement ISB 1442 over trastuzumab |
|-----------------------|----------------------------------------------------------------------|-----------------|----------------------|-----------------|-----------------------------------------------|--------------------------------------------|
|                       | ISB 1442                                                             | ISB 1442 WT Fc  | ISB 1442 silenced Fc | Trastuzumab     |                                               |                                            |
| <b>Human FcγRI</b>    | 0.02 $\pm$ 0.01                                                      | 0.06 $\pm$ 0.01 | No binding           | 0.21 $\pm$ 0.01 | 3.0                                           | 10.5                                       |
| <b>Human FcγRIIA</b>  | 78 $\pm$ 7                                                           | 224 $\pm$ 14    | No binding           | 543 $\pm$ 25    | 2.9                                           | 7.0                                        |
| <b>Human FcγRIIB</b>  | 315 $\pm$ 14                                                         | 1140 $\pm$ 30   | No binding           | 2520 $\pm$ 60   | 3.6                                           | 8.0                                        |
| <b>Human FcγRIIIA</b> | 13 $\pm$ 1                                                           | 57 $\pm$ 2      | No binding           | 142 $\pm$ 5     | 4.4                                           | 10.9                                       |
| <b>Human FcRn</b>     | 181 $\pm$ 39                                                         | 197 $\pm$ 40    | 221 $\pm$ 39         | 224 $\pm$ 21    | 1.1                                           | 1.2                                        |

**Supplementary Table 2.** Summary of  $K_D$  values measured by SPR for the interaction of ISB 1442, ISB 1442 WT Fc, ISB 1442 silenced Fc and trastuzumab with the different Fc receptors. Values are reported as mean  $\pm$  standard deviation of at least three independent replicates.

**Supplementary Table 3. Evaluation of CD38 and CD47 Expression in Tumor Cell Lines by sABC.**

| CD38 Expression on Cell Lines and human RBCs | CD38 sABC x10 <sup>3</sup> | CD47 sABC x10 <sup>3</sup> |
|----------------------------------------------|----------------------------|----------------------------|
| Daudi (B cell lymphoma)                      | 179 ± 51                   | 66 ± 14                    |
| Raji (B cell lymphoma)                       | 187 ± 46                   | 125 ± 60                   |
| KMS-12-BM (MM)                               | 11 ± 5                     | 176 ± 26                   |
| NCI-H929 (PC; MM)                            | 31 ± 35                    | 94 ± 17                    |

**Supplementary Table 3:** Absolute number of specific Antibody Bound per Cell (sABC) on multiple human cell lines. All the values are average (±Standard Deviation [SD]) from different affinity measurement experiments. The specific antibody binding capacity (sABC) indicates the relative target density.

**Supplementary Table 4**

|                 | Cell Line        | N | Cell affinity (nM) Mean +/- SD | Max Binding (RFI) Mean +/- SD               |
|-----------------|------------------|---|--------------------------------|---------------------------------------------|
| <b>CD38low</b>  | <b>NCI-H929</b>  | 3 | 0.34 +/- 0.23                  | 81x10 <sup>3</sup> +/- 10 x10 <sup>3</sup>  |
|                 | <b>KMS-12-BM</b> | 4 | 0.14 +/- 0.03                  | 29 x10 <sup>3</sup> +/- 63 x10 <sup>2</sup> |
| <b>CD38high</b> | <b>Daudi</b>     | 4 | 0.9 +/- 0.43                   | 44 x10 <sup>4</sup> +/- 14 x10 <sup>4</sup> |
|                 | <b>Raji</b>      | 4 | 0.86 +/- 0.21                  | 30 x10 <sup>4</sup> +/- 12 x10 <sup>4</sup> |

**Supplementary Table 4:** Cell affinity of ISB 1442 and maximal binding (Bmax) was evaluated by flow cytometry on a panel of CD38+ cell lines (Table 3). All the values are averages (±Standard Deviation [SD]) from different affinity measurement experiments. N = number of experiments.



**Supplementary Table 5**

| Marker        | Fluorochrome     | CLONE      | Vendor            |
|---------------|------------------|------------|-------------------|
| CD45          | PerCP            | 2D1        | biolegend         |
| CD4           | Spark YG581      | SK3        | biolegend         |
| CD8           | BUV661           | SK1        | BD                |
| CD25          | BV785            | BC96       | Biolegend         |
| CD69          | APC-eF780        | FN50       | Thermo            |
| CD38          | FITC             | polyclonal | Cytognos/Med Tech |
| CD138         | PerCP-eF710      | MI15       | Thermo            |
| CD107a        | BV605            | H4A3       | biolegend         |
| CD56          | V450             | B159       | BD                |
| CD11b         | APC              | ICRF44     | Biolegend         |
| Live/Dead NIR |                  |            | Thermofisher      |
| CD47          | eF450            | B6H12      | Thermo            |
| BCMA          | APC              | 19F2       | Biolegend         |
| CD138         | BV605            | 281-2      | Biolegend         |
| CD38          | FITC             | polyclonal | Cytognos          |
| CD45          | PerCP-eF710      | HI30       | Thermo            |
| CD45          | PerCP            | HI30       | Thermo            |
| CD11b         | BV711            | M1/70      | Biolegend         |
| CD56          | PE-eF610         | NCAM16.2   | Thermo            |
| CD25          | PC7              | BC96       | biolegend         |
| CD8           | BV650            | SK1        | Biolegend         |
| CD69          | BV785            | FN50       | Biolegend         |
| CD107a        | AF700            | H4A3       | BD                |
| BCMA (CD269)  | PE-Dazzle 594    | 19F2       | Biolegend         |
| CD11b         | APC-R700         | M1/70      | BD                |
| CD11c         | BUV805           | B-ly6      | BD                |
| CD138         | PerCP-eFluor 710 | MI15       | Thermo            |
| CD172a        | SB600            | 15-414     | Thermo            |
| CD25          | PE-Fire700       | M-A251     | Biolegend         |
| CD38          | FITC             | polyclonal | Cytognos/Med Tech |
| CD4           | cfluor YG584     | SK3        | Cytek             |
| CD45          | PerCP            | 2D1        | Biolegend         |
| CD47          | APC-Fire750      | CC2C6      | Biolegend         |
| CD56          | BUV737           | NCAM16.2   | BD                |
| CD8           | cFluor V547      | SK1        | Cytek             |
| CD20          | BUV395           | 2H7        | BD biosciences    |
| HLA-DR        | BUV496           | Tu39       | BD biosciences    |
| CD16          | BUV615           | 3G8        | BD biosciences    |
| CD19          | eF450            | HIB19      | ThermoFisher      |
| CD69          | BV650            | FN50       | Biolegend         |
| NKp30 (CD337) | BV785            | P30-15     | Biolegend         |
| CD107a        | APC              | H4A3       | Biolegend         |

**Supplementary Table 5:** Information on antibodies used for flow cytometry experiments.

**Supplementary Movie 1: Live imaging of phagocytosis of CD38 positive tumor cells**

Live imaging performed with Perkin Elmer Operetta in the presence of control antibody. Monocytes-derived macrophages (blue) engulfing of KMS-12-BM CD38<sup>low</sup> tumor cells (green).

**Supplementary Movie 2: Live imaging of phagocytosis of CD38 positive tumor cells**

Live imaging performed with Perkin Elmer Operetta in the presence of ISB1442 used at 80nM. Monocytes-derived macrophages (blue) engulfing of KMS-12-BM CD38<sup>low</sup> tumor cells (green).

**Supplementary Movie 3: Live imaging of phagocytosis of CD38-KO tumor cells**

Live imaging performed with Perkin Elmer Operetta in the presence of anti-CD47 (5F9) used at 8nM. Monocytes-derived macrophages (blue) engulfing NCI-H929 CD38<sup>+</sup> tumor cells (red) or NCI-H929 CD38-KO tumor cells (green).

**Supplementary Movie 4: Live imaging of phagocytosis of CD38-KO tumor cells**

Live imaging performed with Perkin Elmer Operetta in the presence of ISB1442 used at 8nM. Monocytes-derived macrophages (blue) engulfing NCI-H929 CD38<sup>+</sup> tumor cells (red) or NCI-H929 CD38-KO tumor cells (green).
